# Supplementary material for: Commensal bacteria maintain a Qa-1b-restricted unconventional CD8+ T population in gut epithelium
Source: eLife. 2023 Dec 21;12:RP90466. doi: 10.7554/eLife.90466 (PMC10735220; doi:10.7554/eLife.90466)
Supplement: Supplementary file 1. [file elife-90466-supp1.xlsx]

## Sheet: Sheet1
Screening ID	NCBI ID	Peptide	Length
1	Q5WLW2.1_8	YYAEAKPM	8
2	Q5WLW2.1_9	YYAEAKPMV	9
3	A1U2V8.1_8	FAEETPML	8
4	A1U2V8.1_9	KFAEETPML	9
5	A6U852.1_8	AESATPML	8
6	A6U852.1_9	GAESATPML	9
7	A5CDU2.1_8	YHQATPML	8
8	A5CDU2.1_9	QYHQATPML	9
9	Q2G5G2.1	REAEATAML	9
10	A4SR98.1	FYAEEHATP	9
11	Q03EY9.1	FYAEDGTPIL	10
12	A4W6X4.1	FHAEATPL	8
13	A3M02.2	FFAEAKRML	9
14	Q15W53.1_8	FYEACPML	8
15	Q15W53.1_9	SFYEACPML	9
16	P71338.2	YAAATPYALML	11
17	A9KDQ8.1	YAEATSGLPLL	11
18	Q12C38.1	NAAEATRML	9
19	P55386.1	FVIEASPML	9
20	B8H8S3.1	GYADAKPMV	9
21	P66878.1	FYADATERI	9
22	A1WN86.1	FYADVTPAE	9
23	Q1QF31.1	FYTAELTPLML	11
24	A9BNI6.1	IEAIATPML	9
25	A0LJA8.1	FYAGATGMM	9
26	B8F5T7.1	AVTEASPML	9
27	A9WSC4.1	FYAEAGGQV	9
28	A7IFD4.1	YYDEATAMV	9
29	Q1RGF1.1_10	FYGDATRMDL	10
30	Q1RGF1.1_9	FYGDATRMD	9
